# Supplementary material
Source: publisher site journal article supplement (https://www.dovepress.com/article/382303)
Supplement: Supplementary file 1 [file get_supplementary_file.php]

**Supplementary Table 1. Supplementary description of methods.**

| <b>Diagnostic criteria for hypertensive disorders of pregnancy in The Netherlands<sup>a</sup></b> |                                                                                                                                                                                                                                                  | <b>Missing confounder data</b>                                                                                                                                                                                                                                                                                                                                                                                                                                                                                                                                                                                                                                                                                                   |
|---------------------------------------------------------------------------------------------------|--------------------------------------------------------------------------------------------------------------------------------------------------------------------------------------------------------------------------------------------------|----------------------------------------------------------------------------------------------------------------------------------------------------------------------------------------------------------------------------------------------------------------------------------------------------------------------------------------------------------------------------------------------------------------------------------------------------------------------------------------------------------------------------------------------------------------------------------------------------------------------------------------------------------------------------------------------------------------------------------|
| Gestational hypertension                                                                          | A diastolic blood pressure $\geq 90$ mmHg and/or a systolic blood pressure $\geq 140$ mmHg after gestational week 20. The elevated blood pressure needs to be measured twice, with a sphygmomanometer, and with an interval of at least 4 hours. | Missing values on the sufficient set of confounders were 0.3% for parity, 0.9% for pre-pregnancy BMI, 1.3% for asthma, 1.4% for depression, 2.1% for alcohol consumption, 2.3% for smoking, and 24.2% for use of calcium-containing supplements. Overall, 27% of pregnancies had missing data in at least one confounder. We imputed missing values through multiple imputation using chained equations (25 imputations) under the assumptions that data were missing at random. We included exposure and outcome variables, as well as auxiliary variables (maternal age, country of birth, level of education, use of multivitamin supplements, and cohort) in the imputation procedure. Imputed data were used in all models. |
| Preeclampsia                                                                                      | Hypertension in combination with proteinuria of $\geq 300$ mg/24 h                                                                                                                                                                               |                                                                                                                                                                                                                                                                                                                                                                                                                                                                                                                                                                                                                                                                                                                                  |

<sup>a</sup> Source: De Boer J, Zeeman K, Verhoeven C. KNOV-standaard: Hypertensieve aandoeningen tijdens de zwangerschap, bevalling en kraamperiode. Koninklijke Nederlandse Organisatie van Verloskundigen; Utrecht, 2011. Available at: [https://assets.knov.nl/p/557056/none/PDF%20Vakkennis/KNOV\\_Standaard\\_Hypertensie\\_versie2012.pdf](https://assets.knov.nl/p/557056/none/PDF%20Vakkennis/KNOV_Standaard_Hypertensie_versie2012.pdf). Accessed September 7, 2022.

**Supplementary Figure 1. Directed Acyclic Graphs (DAGs) for the identification of sufficient sets of confounders. Separate DAGs were compiled for the association between (panel A) calcium-based antacids and pre-eclampsia, (B) proton pump inhibitors (PPIs) and preeclampsia, (C) calcium-based antacids and gestational hypertension, and (D) PPIs and gestational hypertension.**

AD, antidepressant; BMI, Body Mass Index; GERD, gastro-esophageal reflux disease; NSAID, non-steroidal anti-inflammatory drug

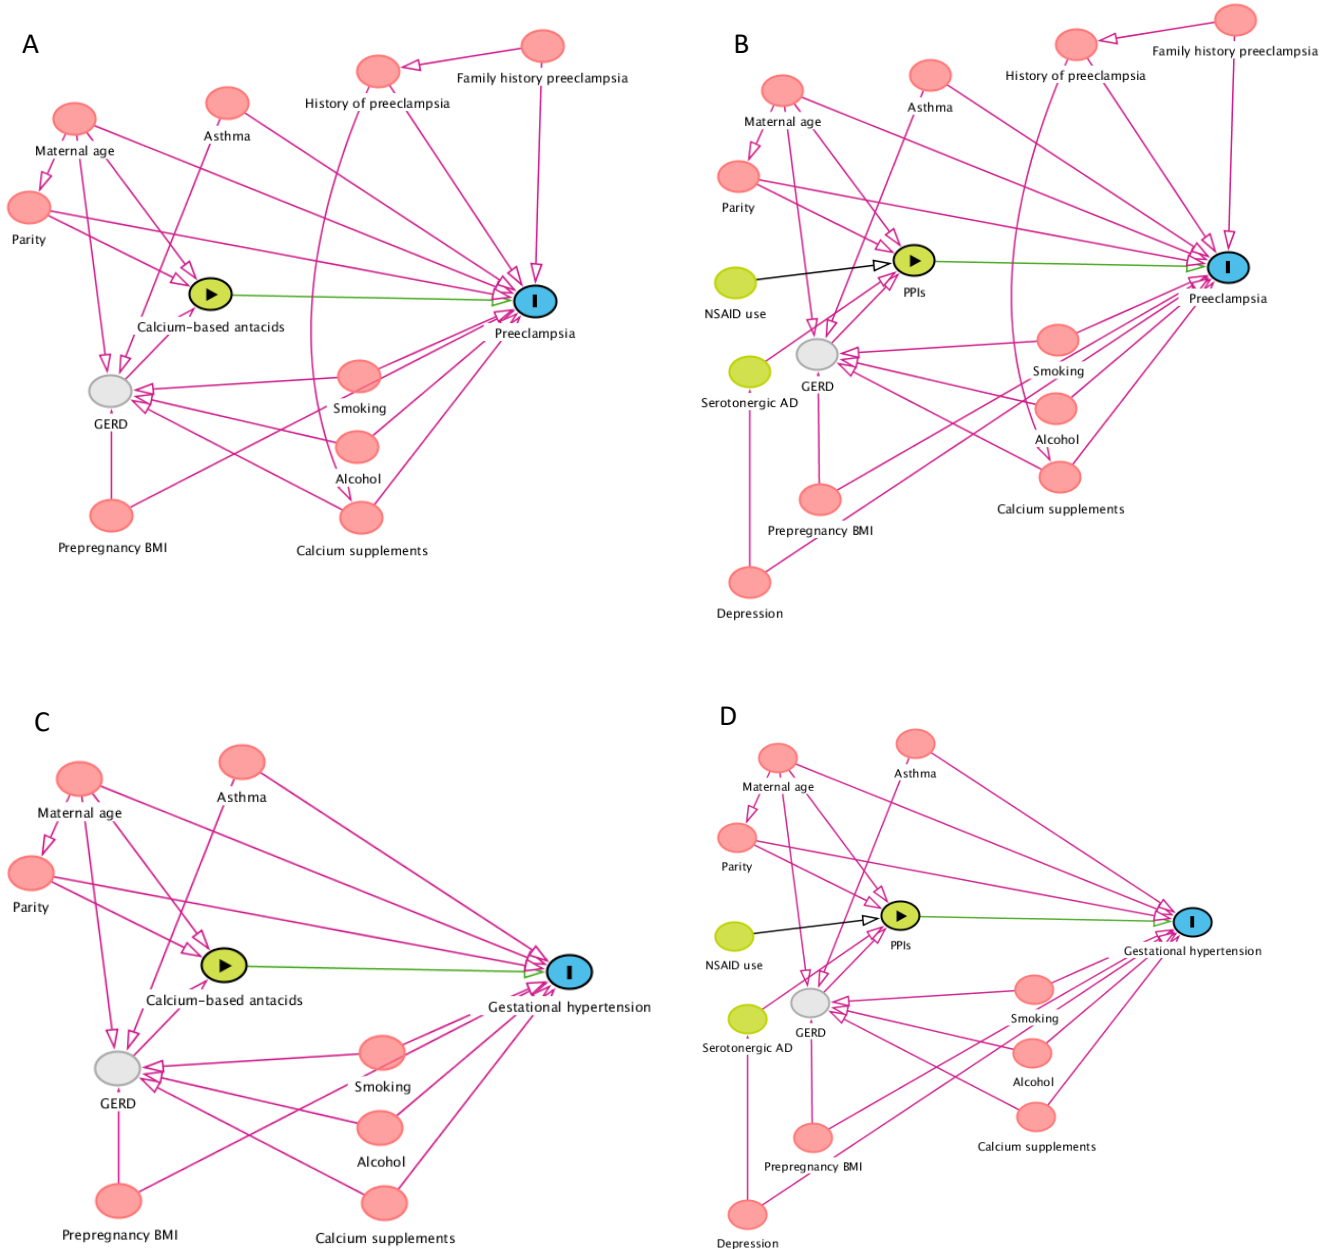

**Supplementary Table 2. Characteristics of pregnancies included in the current study and pregnancies lost-to-follow-up.**

| Characteristic                  | Included<br>(N=9,058) |        | Lost-to-follow-up<br>(N=1,044) |        |
|---------------------------------|-----------------------|--------|--------------------------------|--------|
|                                 | n                     | (%)    | n                              | (%)    |
| Maternal age, mean (SD)         | 31.3                  | (3.7)  | 31.3                           | (4.0)  |
| Country of birth                |                       |        |                                |        |
| The Netherlands                 | 8,625                 | (96.2) | 983                            | (95.9) |
| Other                           | 341                   | (3.8)  | 42                             | (4.1)  |
| Missing                         | 92                    |        | 19                             |        |
| Level of education              |                       |        |                                |        |
| Low/intermediate                | 2,095                 | (23.3) | 333                            | (32.8) |
| High                            | 6,887                 | (76.7) | 681                            | (67.2) |
| Missing                         | 76                    |        | 30                             |        |
| Chronic conditions              |                       |        |                                |        |
| Asthma                          | 566                   | (6.3)  | 73                             | (7.2)  |
| Chronic hypertension            | 28                    | (0.3)  | 4                              | (0.4)  |
| Depression                      | 142                   | (1.6)  | 37                             | (3.7)  |
| Pre-existing diabetes           | 22                    | (0.2)  | 4                              | (0.4)  |
| Pre-pregnancy BMI, mean (SD)    | 23.7                  | (4.1)  | 24.2                           | (4.7)  |
| Parity                          |                       |        |                                |        |
| 0 previous deliveries           | 4,947                 | (54.8) | 537                            | (51.7) |
| ≥1 previous delivery            | 4,083                 | (45.2) | 501                            | (48.3) |
| Missing                         | 28                    |        | 6                              |        |
| History of preeclampsia         |                       |        |                                |        |
| Yes                             | 171                   | (1.9)  | 21                             | (2.1)  |
| No                              | 8,784                 | (98.1) | 1,005                          | (98.0) |
| Missing                         | 103                   |        | 18                             |        |
| Smoking during pregnancy        |                       |        |                                |        |
| Yes                             | 458                   | (5.2)  | 78                             | (8.0)  |
| No                              | 8,369                 | (94.8) | 894                            | (92.0) |
| Missing                         | 231                   |        | 72                             |        |
| Alcohol during pregnancy        |                       |        |                                |        |
| Yes                             | 1,418                 | (16.0) | 144                            | (15.0) |
| No                              | 7,431                 | (84.0) | 819                            | (85.1) |
| Missing                         | 209                   |        | 81                             |        |
| Calcium-containing supplements  |                       |        |                                |        |
| Yes                             | 5,386                 | (78.4) | 563                            | (85.2) |
| No                              | 1,482                 | (21.6) | 98                             | (14.8) |
| Missing                         | 2,190                 |        | 383                            |        |
| Exposed                         |                       |        |                                |        |
| Calcium-based antacids GW 0-33  | 1,860                 | (21.1) | 263                            | (31.8) |
| Calcium-based antacids GW 0-16  | 726                   | (8.1)  | 118                            | (11.5) |
| Calcium-based antacids GW 17-33 | 1,602                 | (18.2) | 181                            | (23.2) |
| Proton pump inhibitors GW 0-33  | 333                   | (3.8)  | 39                             | (5.0)  |
| Proton pump inhibitors GW 0-16  | 171                   | (1.9)  | 23                             | (2.3)  |
| Proton pump inhibitors GW 17-33 | 291                   | (3.3)  | 31                             | (4.0)  |

BMI, Body Mass Index; GW, gestational week; SD, standard deviation

**Supplementary Table 3. Maternal and pregnancy characteristics by cohort.**

| Characteristic                  | PRIDE Study<br>(N=6,741) |        | The Dutch Pregnancy<br>Drug Register<br>(N=2,317) |        |
|---------------------------------|--------------------------|--------|---------------------------------------------------|--------|
|                                 | n                        | (%)    | n                                                 | (%)    |
| Maternal age, mean (SD)         | 31.3                     | (3.7)  | 31.6                                              | (3.8)  |
| Country of birth                |                          |        |                                                   |        |
| The Netherlands                 | 6,425                    | (95.3) | 2,200                                             | (95.0) |
| Other                           | 237                      | (3.5)  | 104                                               | (4.5)  |
| Missing                         | 79                       | (1.2)  | 13                                                | (0.6)  |
| Level of education              |                          |        |                                                   |        |
| Low/intermediate                | 1,533                    | (22.7) | 562                                               | (24.3) |
| High                            | 5,135                    | (76.2) | 1,752                                             | (75.6) |
| Missing                         | 73                       | (1.1)  | 3                                                 | (0.1)  |
| Chronic conditions              |                          |        |                                                   |        |
| Asthma                          | 445                      | (6.6)  | 121                                               | (5.2)  |
| Chronic hypertension            | 11                       | (0.2)  | 17                                                | (0.7)  |
| Depression                      | 93                       | (1.4)  | 49                                                | (2.1)  |
| Pre-existing diabetes           | 8                        | (0.1)  | 14                                                | (0.6)  |
| Pre-pregnancy BMI               |                          |        |                                                   |        |
| Underweight                     | 203                      | (3.0)  | 65                                                | (2.8)  |
| Normal weight                   | 4,637                    | (68.8) | 1,581                                             | (68.2) |
| Overweight                      | 1,318                    | (19.6) | 442                                               | (19.1) |
| Obese                           | 524                      | (7.8)  | 207                                               | (8.9)  |
| Missing                         | 59                       | (0.9)  | 22                                                | (0.9)  |
| Parity                          |                          |        |                                                   |        |
| 0 previous deliveries           | 3,683                    | (54.6) | 1,264                                             | (54.6) |
| ≥1 previous delivery            | 3,058                    | (45.4) | 1,025                                             | (44.2) |
| Missing                         | 0                        | (0.0)  | 28                                                | (1.2)  |
| History of preeclampsia         |                          |        |                                                   |        |
| Yes                             | 124                      | (1.8)  | 47                                                | (2.0)  |
| No                              | 6,559                    | (97.3) | 2,225                                             | (96.0) |
| Missing                         | 58                       | (0.9)  | 45                                                | (1.9)  |
| Smoking during pregnancy        |                          |        |                                                   |        |
| Yes                             | 316                      | (4.7)  | 142                                               | (6.1)  |
| No                              | 6,217                    | (92.2) | 2,152                                             | (92.9) |
| Missing                         | 208                      | (3.1)  | 23                                                | (1.0)  |
| Alcohol during pregnancy        |                          |        |                                                   |        |
| Yes                             | 897                      | (13.3) | 521                                               | (22.5) |
| No                              | 5,650                    | (83.8) | 1,781                                             | (76.9) |
| Missing                         | 194                      | (2.9)  | 15                                                | (0.6)  |
| Calcium-containing supplements  |                          |        |                                                   |        |
| Yes                             | 5,304                    | (78.7) | 82                                                | (3.5)  |
| No                              | 1,153                    | (17.1) | 329                                               | (14.2) |
| Missing                         | 284                      | (4.2)  | 1,906                                             | (82.3) |
| Exposure status                 |                          |        |                                                   |        |
| Calcium-based antacids GW 0-33  | 1,368                    | (20.3) | 495                                               | (21.4) |
| Calcium-based antacids GW 0-16  | 577                      | (8.6)  | 151                                               | (6.5)  |
| Calcium-based antacids GW 17-33 | 1,193                    | (17.7) | 411                                               | (17.7) |
| Proton pump inhibitors GW 0-33  | 220                      | (3.3)  | 112                                               | (4.8)  |
| Proton pump inhibitors GW 0-16  | 114                      | (1.7)  | 56                                                | (2.4)  |
| Proton pump inhibitors GW 17-33 | 200                      | (3.0)  | 89                                                | (3.8)  |

BMI, Body Mass Index; GW, gestational week; SD, standard deviation

**Supplementary Table 4. Maternal and pregnancy characteristics by trajectory group of calcium-based antacid use in gestational weeks 0-33.**

| Characteristic                        | Calcium-based antacid trajectory group <sup>a</sup> |        |                    |        |                     |        |
|---------------------------------------|-----------------------------------------------------|--------|--------------------|--------|---------------------|--------|
|                                       | No use<br>(N=6,964)                                 |        | Low use<br>(N=992) |        | High use<br>(N=123) |        |
| Maternal age, mean (SD)               | 31.4                                                | (3.7)  | 31.5               | (3.7)  | 31.7                | (3.4)  |
| Maternal country of birth, n (%)      |                                                     |        |                    |        |                     |        |
| The Netherlands                       | 6,629                                               | (95.2) | 958                | (96.6) | 116                 | (94.3) |
| Other                                 | 264                                                 | (3.8)  | 29                 | (2.9)  | 5                   | (4.1)  |
| Level of education, n (%)             |                                                     |        |                    |        |                     |        |
| Low/intermediate                      | 1,629                                               | (23.4) | 168                | (16.9) | 27                  | (22.0) |
| High                                  | 5,278                                               | (75.8) | 818                | (82.5) | 93                  | (75.6) |
| Chronic conditions, n (%)             |                                                     |        |                    |        |                     |        |
| Asthma                                | 398                                                 | (5.7)  | 72                 | (7.3)  | 11                  | (8.9)  |
| Chronic hypertension                  | 19                                                  | (0.3)  | 7                  | (0.7)  | 0                   | (0.0)  |
| Depression                            | 113                                                 | (1.6)  | 9                  | (0.9)  | 4                   | (3.3)  |
| Pre-existing diabetes                 | 16                                                  | (0.2)  | 2                  | (0.2)  | 1                   | (0.8)  |
| Pre-pregnancy BMI, mean (SD)          | 23.6                                                | (4.0)  | 23.7               | (4.0)  | 24.6                | (5.2)  |
| Parity, n (%)                         |                                                     |        |                    |        |                     |        |
| 0 previous deliveries                 | 3,764                                               | (54.0) | 572                | (57.7) | 68                  | (55.3) |
| ≥1 previous delivery                  | 3,179                                               | (45.6) | 417                | (42.0) | 55                  | (44.7) |
| History of preeclampsia, n (%)        |                                                     |        |                    |        |                     |        |
| Yes                                   | 131                                                 | (1.9)  | 16                 | (1.6)  | 6                   | (4.9)  |
| No                                    | 6,746                                               | (96.9) | 968                | (97.6) | 116                 | (94.3) |
| Smoking during pregnancy, n (%)       |                                                     |        |                    |        |                     |        |
| Yes                                   | 330                                                 | (4.7)  | 47                 | (4.7)  | 8                   | (6.5)  |
| No                                    | 6,470                                               | (92.9) | 932                | (94.0) | 112                 | (91.1) |
| Alcohol during pregnancy, n (%)       |                                                     |        |                    |        |                     |        |
| Yes                                   | 1,095                                               | (15.7) | 165                | (16.6) | 22                  | (17.9) |
| No                                    | 5,722                                               | (82.2) | 819                | (82.6) | 97                  | (78.9) |
| Calcium-containing supplements, n (%) |                                                     |        |                    |        |                     |        |
| Yes                                   | 4,073                                               | (58.5) | 608                | (61.3) | 77                  | (62.6) |
| No                                    | 1,211                                               | (17.4) | 156                | (15.7) | 16                  | (13.0) |

BMI, Body Mass Index; SD, standard deviation

<sup>a</sup>Numbers may not add up to totals due to missing values, ranging from 0.3% to 0.9% (level of education, chronic hypertension, pre-existing diabetes, pre-pregnancy BMI, and parity), 1.0% to 1.4% (country of birth, asthma, depression, and history of preeclampsia), and 2.1% to 2.3% (smoking and alcohol during pregnancy). For calcium-containing supplement use, missing value was 24.2%, because details on multivitamin use were unavailable in The Dutch Pregnancy Drug Register.

**Supplementary Table 5. Associations between calcium-based antacid and proton pump inhibitor use in gestational weeks 0-19 and gestational hypertension. Data from the PRIDE Study (2012-2019) and The Dutch Pregnancy Drug Register (2014-2019).**

| <b>Exposure group</b>         | <b>Total</b> | <b>N (%) with GH</b> | <b>Crude RR (95% CI)</b> | <b>Adjusted RR (95% CI)<sup>a</sup></b> |
|-------------------------------|--------------|----------------------|--------------------------|-----------------------------------------|
| <b>Calcium-based antacids</b> |              |                      |                          |                                         |
| No use                        | 7,612        | 526 (6.9)            | Reference                | Reference                               |
| Any use                       | 843          | 79 (9.4)             | 1.4 (1.1-1.7)            | 1.2 (1.0-1.5)                           |
| Low dose (<1 g/day)           | 399          | 22 (5.5)             | 0.8 (0.5-1.2)            | 0.7 (0.5-1.1)                           |
| High dose (≥1 g/day)          | 444          | 57 (12.8)            | 1.9 (1.4-2.4)            | 1.6 (1.2-2.1)                           |
| <b>Proton pump inhibitors</b> |              |                      |                          |                                         |
| No use                        | 8,553        | 614 (7.2)            | Reference                | Reference                               |
| Any use                       | 183          | 14 (7.7)             | 1.1 (0.6-1.8)            | 0.8 (0.5-1.4)                           |
| Low dose (≤1 DDD/day)         | 121          | 9 (7.4)              | 1.0 (0.6-2.0)            | 0.8 (0.4-1.6)                           |
| High dose (>1 DDD per day)    | 59           | 5 (8.5)              | 1.2 (0.5-2.7)            | 0.9 (0.4-2.3)                           |

CI, confidence interval; DDD, Defined Daily Dose; GH, gestational hypertension; RR, relative risk

<sup>a</sup> Inverse probability of censoring weights; all models are adjusted for maternal age, asthma, pre-pregnancy BMI, parity, smoking during pregnancy, alcohol use during pregnancy, and use of calcium-containing supplements. Models for proton pump inhibitors are additionally adjusted for depression.

**Supplementary Table 6. Associations between calcium-based antacid and proton pump inhibitor use after gestational week 19 and gestational hypertension. Data from the PRIDE Study (2012-2019) and The Dutch Pregnancy Drug Register (2014-2019).**

| <b>Time-dependent exposure after GW19</b> | <b>N</b> | <b>GH</b> | <b>Person weeks</b> | <b>Rate (per 1000/week)</b> | <b>Crude HR (95% CI)</b> | <b>Adjusted HR (95% CI)<sup>a</sup></b> |
|-------------------------------------------|----------|-----------|---------------------|-----------------------------|--------------------------|-----------------------------------------|
| <b>Calcium-based antacids</b>             |          |           |                     |                             |                          |                                         |
| No use                                    | 8,070    | 617       | 138,143             | 4.5                         | Reference                | Reference                               |
| Any use                                   | 1,260    | 90        | 14,176              | 6.3                         | 1.3 (1.0-1.6)            | 1.2 (1.0-1.5)                           |
| Low dose (<1 g/day)                       | 698      | 40        | 7,255               | 5.5                         | 1.2 (0.9-1.7)            | 1.2 (0.9-1.6)                           |
| High dose (≥1 g/day)                      | 680      | 50        | 6,921               | 7.2                         | 1.3 (1.0-1.8)            | 1.2 (0.9-1.7)                           |
| <b>Proton pump inhibitors</b>             |          |           |                     |                             |                          |                                         |
| No use                                    | 8,674    | 743       | 163,147             | 4.6                         | Reference                | Reference                               |
| Any use                                   | 279      | 21        | 3,354               | 6.3                         | 1.2 (0.8-1.9)            | 1.1 (0.7-1.7)                           |
| Low dose (≤1 DDD/day)                     | 230      | 16        | 2,602               | 6.1                         | 1.2 (0.7-2.0)            | 1.1 (0.7-1.8)                           |
| High dose (>1 DDD/day)                    | 63       | 5         | 752                 | 6.6                         | 1.3 (0.6-3.2)            | 1.1 (0.4-2.7)                           |

CI, confidence interval; DDD, Defined Daily Dose; GH, gestational hypertension; GW, gestational week; HR, hazard ratio.

<sup>a</sup> Inverse probability of censoring weights; all models are adjusted for maternal age, asthma, pre-pregnancy BMI, parity, smoking during pregnancy, alcohol use during pregnancy, and use of calcium-containing supplements. Models for proton pump inhibitors are additionally adjusted for depression.

**Supplementary Table 7. Associations between calcium-based antacid and proton pump inhibitor use in gestational weeks 0-33 and late-onset preeclampsia among women at high risk of developing preeclampsia. Data from the PRIDE Study (2012-2019).**

| Exposure group                     | Total | N (%) with PE | Crude RR (95% CI) | Adjusted RR (95% CI) <sup>a</sup> |
|------------------------------------|-------|---------------|-------------------|-----------------------------------|
| Calcium-based antacids in GW 0-33  |       |               |                   |                                   |
| No use                             | 1,563 | 75 (4.8)      | Reference         | Reference                         |
| Any use                            | 493   | 31 (6.3)      | 1.3 (0.9-2.0)     | 1.2 (0.8-1.9)                     |
| Low dose (<1 g/day)                | 257   | 16 (6.2)      | 1.3 (0.8-2.2)     | 1.2 (0.7-2.1)                     |
| High dose (≥1 g/day)               | 231   | 15 (6.5)      | 1.4 (0.8-2.3)     | 1.3 (0.7-2.2)                     |
| Low use trajectory                 | 262   | 16 (6.1)      | 1.3 (0.8-2.1)     | 1.3 (0.8-2.1)                     |
| High use trajectory                | 35    | 2 (5.7)       | 1.2 (0.3-4.7)     | N/A                               |
| Calcium-based antacids in GW 0-16  |       |               |                   |                                   |
| No use                             | 1,859 | 90 (4.8)      | Reference         | Reference                         |
| Any use                            | 203   | 14 (6.9)      | 1.4 (0.8-2.5)     | 1.3 (0.8-2.3)                     |
| Low dose (<1 g/day)                | 82    | 10 (12.2)     | 2.5 (1.4-4.7)     | 2.3 (1.2-4.4)                     |
| High dose (≥1 g/day)               | 56    | 1 (1.8)       | N/A               | N/A                               |
| Calcium-based antacids in GW 17-33 |       |               |                   |                                   |
| No use                             | 1,623 | 83 (5.1)      | Reference         | Reference                         |
| Any use                            | 427   | 23 (5.4)      | 1.1 (0.7-1.6)     | 1.0 (0.6-1.6)                     |
| Low dose (<1 g/day)                | 232   | 8 (3.5)       | 0.7 (0.3-1.4)     | 0.7 (0.3-1.3)                     |
| High dose (≥1 g/day)               | 172   | 13 (7.6)      | 1.5 (0.8-2.6)     | 1.3 (0.8-2.4)                     |
| Proton pump inhibitors in GW 0-33  |       |               |                   |                                   |
| No use                             | 1,986 | 97 (4.9)      | Reference         | Reference                         |
| Any use                            | 74    | 9 (12.2)      | 2.5 (1.3-4.7)     | 2.2 (1.2-4.3)                     |
| Low dose (≤1 DDD/day)              | 56    | 7 (12.5)      | 2.6 (1.2-5.3)     | 2.3 (1.1-4.8)                     |
| High dose (>1 DDD per day)         | 18    | 2 (11.1)      | 2.3 (0.6-8.5)     | N/A                               |
| Proton pump inhibitors in GW 0-16  |       |               |                   |                                   |
| No use                             | 2,039 | 103 (5.1)     | Reference         | Reference                         |
| Any use                            | 35    | 3 (8.6)       | 1.7 (0.6-5.1)     | 1.4 (0.5-4.3)                     |
| Low dose (≤1 DDD/day)              | 15    | 2 (13.3)      | 2.6 (0.7-9.7)     | N/A                               |
| High dose (>1 DDD/day)             | 13    | 0 (0.0)       | N/A               | N/A                               |
| Proton pump inhibitors in GW 17-33 |       |               |                   |                                   |
| No use                             | 1,991 | 97 (4.9)      | Reference         | Reference                         |
| Any use                            | 69    | 9 (13.0)      | 2.7 (1.4-5.1)     | 2.4 (1.2-4.7)                     |
| Low dose (≤1 DDD/day)              | 48    | 6 (12.5)      | 2.6 (1.2-5.6)     | 2.4 (1.1-5.1)                     |
| High dose (>1 DDD/day)             | 13    | 2 (15.4)      | 3.2 (0.9-11.4)    | N/A                               |

CI, confidence interval; DDD, Defined Daily Dose; GW, gestational week; PE, preeclampsia; RR, relative risk  
<sup>a</sup> Inverse probability of censoring weights; all models are adjusted for maternal age, asthma, pre-pregnancy BMI, parity, smoking during pregnancy, alcohol use during pregnancy, and use of calcium-containing supplements. Models for proton pump inhibitors are additionally adjusted for depression.



**Supplementary Table 8. Associations between calcium-based antacid and proton pump inhibitor use after gestational week 33 and late-onset preeclampsia among women at high risk of developing preeclampsia. Data from the PRIDE Study (2012-2019).**

| <b>Time-dependent exposure after GW33</b> | <b>N</b> | <b>PE</b> | <b>Person weeks</b> | <b>Rate (per 1000/week)</b> | <b>Crude HR (95% CI)</b> | <b>Adjusted HR (95% CI)<sup>a</sup></b> |
|-------------------------------------------|----------|-----------|---------------------|-----------------------------|--------------------------|-----------------------------------------|
| Calcium-based antacids                    |          |           |                     |                             |                          |                                         |
| No use                                    | 1,810    | 88        | 9,224               | 9.5                         | Reference                | Reference                               |
| Any use                                   | 292      | 9         | 1,343               | 6.7                         | 0.7 (0.4-1.4)            | 0.7 (0.3-1.3)                           |
| Low dose (<1 g/day)                       | 136      | 3         | 602                 | 5.0                         | 0.5 (0.2-1.6)            | N/A                                     |
| High dose (≥1 g/day)                      | 169      | 6         | 741                 | 8.1                         | 0.8 (0.4-1.9)            | 0.8 (0.3-1.8)                           |
| Proton pump inhibitors                    |          |           |                     |                             |                          |                                         |
| No use                                    | 2,045    | 97        | 10,789              | 9.0                         | Reference                | Reference                               |
| Any use                                   | 62       | 5         | 263                 | 19.0                        | 2.2 (0.9-5.4)            | 2.1 (0.8-5.2)                           |
| Low dose (≤1 DDD/day)                     | 49       | 3         | 204                 | 14.7                        | 1.7 (0.5-5.4)            | N/A                                     |
| High dose (>1 DDD/day)                    | 16       | 2         | 59                  | 33.9                        | 4.1 (1.0-15.8)           | N/A                                     |

CI, confidence interval; DDD, Defined Daily Dose; GW, gestational week; HR, hazard ratio; PE, preeclampsia.

<sup>a</sup> Inverse probability of censoring weights; all models are adjusted for maternal age, asthma, pre-pregnancy BMI, parity, smoking during pregnancy, alcohol use during pregnancy, and use of calcium-containing supplements. Models for proton pump inhibitors are additionally adjusted for depression.

**Supplementary Table 9. Associations between calcium-based antacid and proton pump inhibitor use in gestational weeks 0-33 and late-onset preeclampsia, restricted to women who did not use calcium-containing supplements. Data from the PRIDE Study (2012-2019) and The Dutch Pregnancy Drug Register (2014-2019).**

| Exposure group                            | Total | N (%) with PE | Crude RR (95% CI) | Adjusted RR (95% CI) <sup>a</sup> |
|-------------------------------------------|-------|---------------|-------------------|-----------------------------------|
| <b>Calcium-based antacids in GW 0-33</b>  |       |               |                   |                                   |
| No use                                    | 1,211 | 30 (2.5)      | Reference         | Reference                         |
| Any use                                   | 266   | 10 (3.8)      | 1.5 (0.8-3.1)     | 1.3 (0.6-2.6)                     |
| Low dose (<1 g/day)                       | 138   | 3 (2.2)       | 0.9 (0.3-2.8)     | N/A                               |
| High dose (≥1 g/day)                      | 125   | 7 (5.6)       | 2.3 (1.0-5.0)     | 1.9 (0.9-4.4)                     |
| Low use trajectory                        | 156   | 4 (2.6)       | 1.0 (0.4-2.9)     | N/A                               |
| High use trajectory                       | 16    | 1 (6.3)       | N/A               | N/A                               |
| <b>Calcium-based antacids in GW 0-16</b>  |       |               |                   |                                   |
| No use                                    | 1,379 | 36 (2.6)      | Reference         | Reference                         |
| Any use                                   | 101   | 3 (3.0)       | 1.1 (0.4-3.6)     | N/A                               |
| Low dose (<1 g/day)                       | 48    | 2 (4.2)       | 1.6 (0.4-6.4)     | N/A                               |
| High dose (≥1 g/day)                      | 29    | 1 (3.5)       | N/A               | N/A                               |
| <b>Calcium-based antacids in GW 17-33</b> |       |               |                   |                                   |
| No use                                    | 1,240 | 32 (2.6)      | Reference         | Reference                         |
| Any use                                   | 237   | 8 (3.4)       | 1.3 (0.6-2.8)     | 1.2 (0.6-2.5)                     |
| Low dose (<1 g/day)                       | 124   | 2 (1.6)       | 0.6 (0.2-2.6)     | N/A                               |
| High dose (≥1 g/day)                      | 102   | 6 (5.9)       | 2.3 (1.0-5.3)     | 2.1 (0.9-4.9)                     |
| <b>Proton pump inhibitors in GW 0-33</b>  |       |               |                   |                                   |
| No use                                    | 1,433 | 39 (2.7)      | Reference         | Reference                         |
| Any use                                   | 48    | 1 (2.1)       | N/A               | N/A                               |
| Low dose (≤1 DDD/day)                     | 31    | 1 (3.2)       | N/A               | N/A                               |
| High dose (>1 DDD per day)                | 17    | 0 (0.0)       | N/A               | N/A                               |
| <b>Proton pump inhibitors in GW 0-16</b>  |       |               |                   |                                   |
| No use                                    | 1,455 | 40 (2.8)      | Reference         | Reference                         |
| Any use                                   | 26    | 0 (0.0)       | N/A               | N/A                               |
| Low dose (≤1 DDD/day)                     | 13    | 0 (0.0)       | N/A               | N/A                               |
| High dose (>1 DDD/day)                    | 11    | 0 (0.0)       | N/A               | N/A                               |
| <b>Proton pump inhibitors in GW 17-33</b> |       |               |                   |                                   |
| No use                                    | 1,441 | 39 (2.7)      | Reference         | Reference                         |
| Any use                                   | 40    | 1 (2.5)       | N/A               | N/A                               |
| Low dose (≤1 DDD/day)                     | 24    | 0 (0.0)       | N/A               | N/A                               |
| High dose (>1 DDD/day)                    | 13    | 0 (0.0)       | N/A               | N/A                               |

CI, confidence interval; DDD, Defined Daily Dose; GW, gestational week; PE, preeclampsia; RR, relative risk  
<sup>a</sup> Inverse probability of censoring weights; all models are adjusted for maternal age, asthma, pre-pregnancy BMI, parity, smoking during pregnancy, and alcohol use during pregnancy.

**Supplementary Table 10. Associations between calcium-based antacid and proton pump inhibitor use after gestational week 33 and late-onset preeclampsia, restricted to women who did not use calcium-containing supplements. Data from the PRIDE Study (2012-2019) and The Dutch Pregnancy Drug Register (2014-2019).**

| <b>Time-dependent exposure after GW19</b> | <b>N</b> | <b>PE</b> | <b>Person weeks</b> | <b>Rate (per 1000/week)</b> | <b>Crude HR (95% CI)</b> | <b>Adjusted HR (95% CI)</b> |
|-------------------------------------------|----------|-----------|---------------------|-----------------------------|--------------------------|-----------------------------|
| <b>Calcium-based antacids</b>             |          |           |                     |                             |                          |                             |
| No use                                    | 1,358    | 36        | 7,218               | 5.0                         | Reference                | Reference                   |
| Any use                                   | 170      | 3         | 789                 | 3.8                         | 0.7 (0.2-2.3)            | N/A                         |
| Low dose (<1 g/day)                       | 79       | 2         | 350                 | 5.7                         | 1.1 (0.3-4.4)            | N/A                         |
| High dose (≥1 g/day)                      | 97       | 1         | 439                 | 2.3                         | N/A                      | N/A                         |
| <b>Proton pump inhibitors</b>             |          |           |                     |                             |                          |                             |
| No use                                    | 1,484    | 39        | 8,048               | 4.8                         | Reference                | Reference                   |
| Any use                                   | 40       | 0         | 172                 | 0.0                         | N/A                      | N/A                         |
| Low dose (≤1 DDD/day)                     | 28       | 0         | 117                 | 0.0                         | N/A                      | N/A                         |
| High dose (>1 DDD /day)                   | 13       | 0         | 55                  | 0.0                         | N/A                      | N/A                         |

CI, confidence interval; DDD, Defined Daily Dose; GW, gestational week; HR, hazard ratio; PE, preeclampsia.
